# Supplementary material for: The Fate and Distribution of Autologous Bone Marrow Mesenchymal Stem Cells with Intra-Arterial Infusion in Osteonecrosis of the Femoral Head in Dogs
Source: Stem Cells Int. 2015 Dec 8;2016:8616143. doi: 10.1155/2016/8616143 (PMC4686726; doi:10.1155/2016/8616143)
Supplement: Supplementary file 1 — The immunofluorescent analysis in SHAM operated group showed the osteocalcin could express in the necrotic region of femoral heads (Supplemental Figures 1(a), 1(b), 1(c)). Besides, more PPAR-γ expressed in SHAM operated group than that in MSCs group (Supplemental Figures 1(d), 1(e), 1(f)). [file 8616143.f1.docx]

**Supplemental Information**

**The fate and distribution of autologous bone marrow mesenchymal stem cells with intra-arterial infusion in osteonecrosis of the femoral head in dogs**

Hongting Jin1,2¶, Taotao Xu1,2¶, Qiqing Chen1,2, Chengliang Wu1,2, Pinger Wang1,2, Qiang Mao3, Shanxing Zhang1,2, Jiayi Shen1,2, Peijian Tong3*

1Zhejiang Chinese Medical University, Hangzhou 310053, Zhejiang Province, China

2Institute of Orthopaedics and Traumatology of Zhejiang Province, Hangzhou 310053, Zhejiang Province, China

3Department of Orthopaedic Surgery, the First Affiliated Hospital of Zhejiang Chinese Medical University, Hangzhou 310006, Zhejiang Province, China

Hongting Jin, E-mail: hongtingjin@163.com

Taotao Xu, E-mail: nacle1990829@163.com

Qiqing Chen, E-mail: zy.chenqiqing@163.com

Chengliang Wu, E-mail: wcl@zcmu.edu.cn

Pinger Wang, E-mail: apple63209321@126.com

Qiang Mao, E-mail: peijiantongzy@126.com

Shanxing Zhang, E-mail: 15700050235@163.com

Jiayi Shen, E-mail: 15158190224@163.com

*****Corresponding author

Peijian Tong, M.D.

The First Affiliated Hospital of Zhejiang Chinese Medical University,

You Dian Road NO.54, Hangzhou 310006

Zhejiang Province

People’s Republic of China

Tel: 011-86 571-86613684; Fax: 011-86 571-86613684

Email: [peijiantongzjtcm@163.com]

¶These authors contributed equally to this work.

**Supplemental Figure 1. The immunofluorescent analysis of osteocalcin and PPAR-γ in the necrotic region of femoral heads in SHAM operated group.**


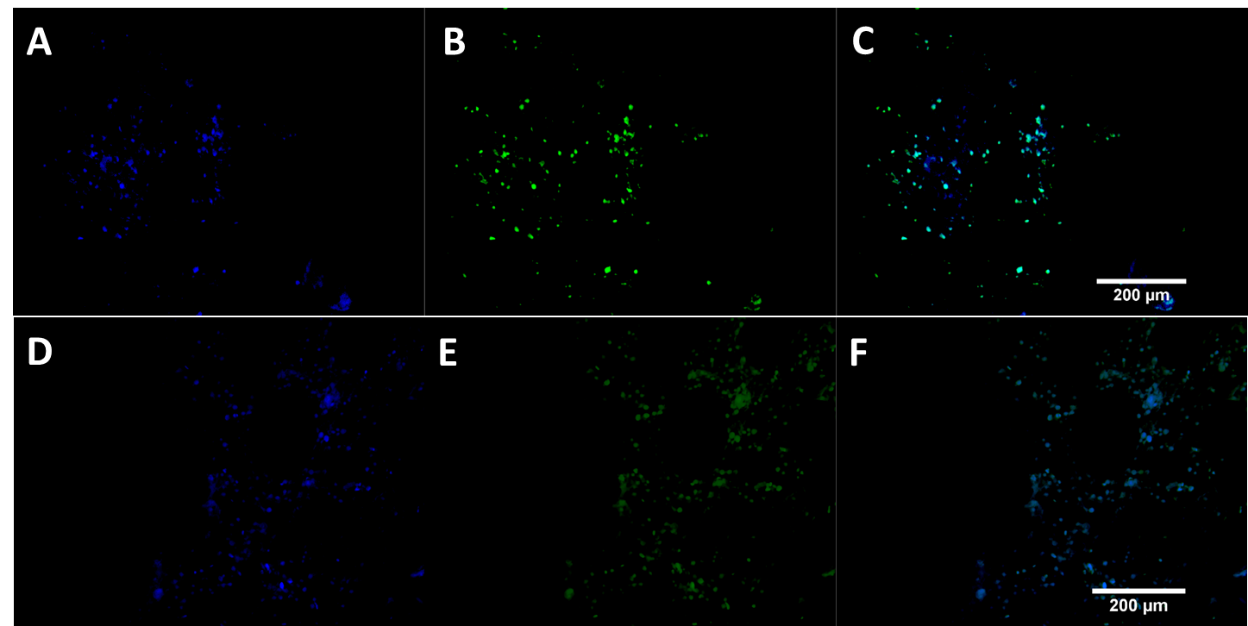


BrdU (green) and osteocalcin (red) were analysed by immunofluorescent analysis in the necrotic region of femoral heads in SHAM operated group. A: DAPI(blue); B: osteocalcin(green); C: an overlay of A and B; D: DAPI(blue); E: PPAR-γ (green); F: an overlay of D and E. *Scale bar 200 μm.*
